# Supplementary material for: Individual differences in normal body temperature: longitudinal big data analysis of patient records
Source: PubMed Central journal article supplement — BMJ. 2017 Dec 13;359:j5468. doi: 10.1136/bmj.j5468 (PMC5727437; doi:10.1136/bmj.j5468), 2017-12-13

## **Supplement**

### *Contents*

eTable 1a-c. Exclusions.

eFigure 1. Fixed effects distribution.

eTable 2. Temporal and environmental predictors of body temperature.

eTable3. Table 2 with p-values adjusted using Holm, Hochberg, and Bonferroni methods.

eFigure 2a-b. Laboratory studies.

**eTable 1.** Exclusion criteria used in cohort construction.

A) Percentage of visits excluded by criterion

| Category                                                                  | Percentage of visits excluded (%) |
|---------------------------------------------------------------------------|-----------------------------------|
| Age above 18                                                              | 0.58                              |
| Weekday                                                                   | 1.09                              |
| 7am – 6pm                                                                 | 0.77                              |
| Within physiological range (32 – 45°C)                                    | 0.04                              |
| No antibiotics within one week                                            | 19.08                             |
| No infection codes within one week                                        | 19.30                             |
| Only one temperature measurement per patient (after all other exclusions) | 8.63                              |

Percentages are relative to all outpatient visits (patient-days) with at least one temperature measurement within the 2009-2014 period

B) Top 10 Antibiotic categories excluded, by SNOMED category

| Antibiotic category    | Number of visits excluded |
|------------------------|---------------------------|
| beta-lactam            | 24779                     |
| quinolone              | 16692                     |
| macrolide              | 14748                     |
| urinary anti-infective | 13789                     |
| nitroimidazole         | 8195                      |
| aminoglycoside         | 5609                      |
| tetracycline           | 5312                      |
| glycopeptide           | 3927                      |
| polymyxins             | 905                       |
| rifamycins             | 654                       |

C) Top 10 Infection categories excluded

| Infection category                                      | Number of visits excluded | ICD 9 codes                                                                                                    |
|---------------------------------------------------------|---------------------------|----------------------------------------------------------------------------------------------------------------|
| Infectious and Parasitic Diseases                       | 22302                     | 001-139                                                                                                        |
| Acute Respiratory infections                            | 18078                     | 460-466                                                                                                        |
| UTI                                                     | 8890                      | 599.0, 595.1, 595.2, 595.9, 597.80, 595.0, 597.0, 595.82, 595.89, 595.81, 598.00, 597.89, 595.4, 595.3, 597.81 |
| Infections of skin and subcutaneous tissue              | 7901                      | 680-686                                                                                                        |
| Pneumonia and Influenza                                 | 4749                      | 480-488                                                                                                        |
| Fever and other physiologic disturbances of temperature | 4246                      | 780.6                                                                                                          |
| Inflammatory disease of female pelvic organs            | 4238                      | 614-616                                                                                                        |
| Synovitis and tenosynovitis                             | 1929                      | 727                                                                                                            |

|                                                               |      |                                                                                                                                                                                                                                                                                                                                                                                                                                               |
|---------------------------------------------------------------|------|-----------------------------------------------------------------------------------------------------------------------------------------------------------------------------------------------------------------------------------------------------------------------------------------------------------------------------------------------------------------------------------------------------------------------------------------------|
| Osteomyelitis periostitis and other infections involving bone | 1673 | 730                                                                                                                                                                                                                                                                                                                                                                                                                                           |
| Eye infection                                                 | 1532 | 372.30, 372.13, 372.14, 372.10, 372.00, 377.39, 377.30, 377.32, 364.3, 375.30, 372.39, 360.19, 364.00, 360.11, 363.21, 372.11, 372.03, 372.05, 375.42, 364.04, 360.00, 375.03, 360.01, 363.20, 375.32, 372.02, 372.06, 364.10, 363.14, 372.21, 364.05, 372.20, 364.24, 360.12, 364.03, 363.01, 363.04, 364.01, 372.31, 364.02, 363.03, 375.00, 377.31, 377.34, 364.11, 377.33, 372.33, 375.01, 372.22, 363.05, 372.04, 372.01, 363.00, 363.22 |

**eFigure 1.** Distribution of individual effect coefficients estimated using a fixed effects model

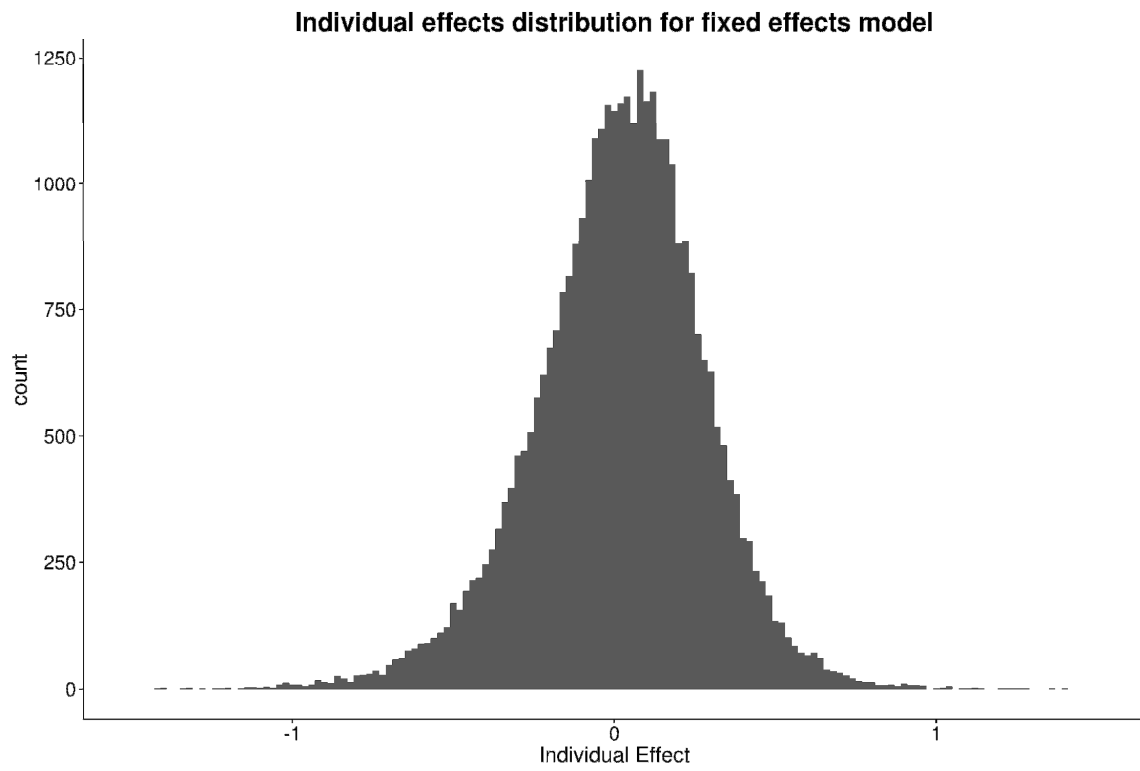

**eTable 2.** Temporal and environmental effects coefficients for random effects model

|                       | <b>Coefficient</b> | <b>Std. Error</b> | <b>P-value</b> |
|-----------------------|--------------------|-------------------|----------------|
| Year: 2009            | <i>Reference</i>   |                   |                |
| Year: 2010            | 0.00003            | 0.00335           | 0.99298        |
| Year: 2011            | -0.00431           | 0.00348           | 0.21519        |
| Year: 2012            | 0.00878            | 0.00349           | 0.01192        |
| Year: 2013            | 0.01255            | 0.00356           | <0.001         |
| Year: 2014            | 0.02816            | 0.00412           | <0.001         |
| January               | 0.01146            | 0.00460           | 0.01280        |
| February              | 0.01326            | 0.00459           | 0.00390        |
| March                 | 0.00281            | 0.00401           | 0.48332        |
| April                 | <i>Reference</i>   |                   |                |
| May                   | -0.01606           | 0.00394           | <0.001         |
| June                  | -0.06151           | 0.00489           | <0.001         |
| July                  | -0.04568           | 0.00447           | <0.001         |
| August                | -0.05998           | 0.00484           | <0.001         |
| September             | -0.04990           | 0.00440           | <0.001         |
| October               | -0.02837           | 0.00397           | <0.001         |
| November              | -0.00093           | 0.00395           | 0.81339        |
| December              | -0.00038           | 0.00436           | 0.93109        |
| 7:00 AM               | -0.04172           | 0.00751           | <0.001         |
| 8:00 AM               | -0.05709           | 0.00411           | <0.001         |
| 9:00 AM               | -0.05081           | 0.00372           | <0.001         |
| 10:00 AM              | -0.03099           | 0.00361           | <0.001         |
| 11:00 AM              | -0.01384           | 0.00368           | <0.001         |
| 12:00 PM              | <i>Reference</i>   |                   |                |
| 1:00 PM               | 0.00630            | 0.00372           | 0.09017        |
| 2:00 PM               | 0.01849            | 0.00377           | <0.001         |
| 3:00 PM               | 0.03112            | 0.00394           | <0.001         |
| 4:00 PM               | 0.03371            | 0.00464           | <0.001         |
| 5:00 PM               | 0.02007            | 0.00838           | 0.01668        |
| Monday                | <i>Reference</i>   |                   |                |
| Tuesday               | -0.00433           | 0.00265           | 0.10210        |
| Wednesday             | -0.00588           | 0.00273           | 0.03138        |
| Thursday              | -0.01003           | 0.00273           | <0.001         |
| Friday                | -0.00676           | 0.00284           | 0.01749        |
| Site: Axillary        | -0.26414           | 0.04740           | <0.001         |
| Site: Blank           | -0.16912           | 0.00507           | <0.001         |
| Site: Oral            | <i>Reference</i>   |                   |                |
| Site: Rectal          | 0.04384            | 0.13647           | 0.74801        |
| Site: Temporal        | -0.03197           | 0.00504           | <0.001         |
| Site: Tympanic        | -0.06000           | 0.00595           | <0.001         |
| Temperature Decile: 1 | -0.01912           | 0.00558           | <0.001         |
| Temperature Decile: 2 | -0.00938           | 0.00445           | 0.03497        |
| Temperature Decile: 3 | -0.01598           | 0.00405           | <0.001         |
| Temperature Decile: 4 | -0.00725           | 0.00363           | 0.04570        |

|                        |                  |         |         |
|------------------------|------------------|---------|---------|
| Temperature Decile: 5  | <i>Reference</i> |         |         |
| Temperature Decile: 6  | 0.00789          | 0.00346 | 0.02271 |
| Temperature Decile: 7  | 0.02004          | 0.00366 | <0.001  |
| Temperature Decile: 8  | 0.03131          | 0.00407 | <0.001  |
| Temperature Decile: 9  | 0.03306          | 0.00432 | <0.001  |
| Temperature Decile: 10 | 0.05153          | 0.00471 | <0.001  |
| Dew Point Decile: 1    | -0.03652         | 0.00490 | <0.001  |
| Dew Point Decile: 2    | -0.02921         | 0.00399 | <0.001  |
| Dew Point Decile: 3    | -0.02054         | 0.00377 | <0.001  |
| Dew Point Decile: 4    | -0.01373         | 0.00345 | <0.001  |
| Dew Point Decile: 5    | <i>Reference</i> |         |         |
| Dew Point Decile: 6    | 0.00237          | 0.00356 | 0.50672 |
| Dew Point Decile: 7    | 0.02009          | 0.00361 | <0.001  |
| Dew Point Decile: 8    | 0.02956          | 0.00384 | <0.001  |
| Dew Point Decile: 9    | 0.03144          | 0.00407 | <0.001  |
| Dew Point Decile: 10   | 0.04007          | 0.00441 | <0.001  |

**eTable3.** Regression of individual temperature effect on demographics, comorbidities, and physiological measurements with p-values adjusted using Holm, Hochberg, and Bonferroni methods.

| Predictor variables included in the model | Regression coefficients modeling individual temperature |           |        |                  |                    |            |
|-------------------------------------------|---------------------------------------------------------|-----------|--------|------------------|--------------------|------------|
|                                           | Coefficient                                             | Std. Err. | p      | Adjusted p       |                    |            |
|                                           |                                                         |           |        | Holm             | Benjamini-Hochberg | Bonferroni |
| <i>Demographics</i>                       |                                                         |           |        |                  |                    |            |
| Age <sup>†</sup>                          | -0.021                                                  | 0.001     | <0.001 | <0.001           | <0.001             | <0.001     |
| White <sup>§</sup> Female                 | 0.023                                                   | 0.003     | <0.001 | <0.001           | <0.001             | <0.001     |
| White <sup>§</sup> Male                   |                                                         |           |        | <i>reference</i> |                    |            |
| Black Female                              | 0.052                                                   | 0.004     | <0.001 | <0.001           | <0.001             | <0.001     |
| Black Male                                | 0.015                                                   | 0.006     | 0.009  | 0.124            | 0.124              | 0.249      |
| Hispanic Female                           | 0.030                                                   | 0.004     | <0.001 | <0.001           | <0.001             | <0.001     |
| Hispanic Male                             | 0.019                                                   | 0.006     | 0.001  | 0.014            | 0.014              | 0.023      |
| <i>Comorbidities</i>                      |                                                         |           |        |                  |                    |            |
| Comorbidity Sum Score <sup>a</sup>        | 0.002                                                   | 0.002     | 0.268  | 1                | 0.956              | 1          |
| Hypertension <sup>‡</sup>                 | -1.7e-4                                                 | 0.003     | 0.956  | 1                | 0.956              | 1          |
| Tumor <sup>¶</sup>                        | 0.020                                                   | 0.003     | <0.001 | <0.001           | <0.001             | <0.001     |
| Arrhythmia <sup>‡</sup>                   | -0.002                                                  | 0.004     | 0.624  | 1                | 0.956              | 1          |
| Pulmonary Disease <sup>¶</sup>            | -0.012                                                  | 0.004     | 0.001  | 0.011            | 0.011              | 0.015      |
| Uncomplicated Diabetes <sup>‡</sup>       | 0.009                                                   | 0.003     | 0.005  | 0.076            | 0.076              | 0.142      |
| Depression <sup>‡</sup>                   | 0.008                                                   | 0.003     | 0.013  | 0.165            | 0.165              | 0.355      |
| Anemia <sup>‡</sup>                       | 0.005                                                   | 0.004     | 0.240  | 1                | 0.956              | 1          |
| Obesity <sup>‡</sup>                      | -0.011                                                  | 0.004     | 0.004  | 0.059            | 0.059              | 0.104      |
| Electrolytes <sup>‡</sup>                 | -0.003                                                  | 0.004     | 0.463  | 1                | 0.956              | 1          |
| Hypothyroid <sup>‡</sup>                  | -0.013                                                  | 0.004     | 0.001  | 0.012            | 0.012              | 0.018      |
| Congestive Heart Failure <sup>¶</sup>     | -0.027                                                  | 0.006     | <0.001 | <0.001           | <0.001             | <0.001     |
| Metastatic <sup>¶</sup>                   | 0.004                                                   | 0.010     | 0.680  | 1                | 0.956              | 1          |
| Renal <sup>‡</sup>                        | -0.025                                                  | 0.006     | <0.001 | <0.001           | <0.001             | <0.001     |
| Psychosis <sup>‡</sup>                    | -0.005                                                  | 0.005     | 0.335  | 1                | 0.956              | 1          |
| Cerebrovascular <sup>¶</sup>              | 0.003                                                   | 0.004     | 0.526  | 1                | 0.956              | 1          |
| Neurodegenerative <sup>‡</sup>            | -0.003                                                  | 0.005     | 0.531  | 1                | 0.956              | 1          |
| <i>Physiological measures</i>             |                                                         |           |        |                  |                    |            |
| BMI, kg/m <sup>2</sup>                    | 0.002                                                   | 1.8e-4    | <0.001 | <0.001           | <0.001             | <0.001     |
| Pulse, bpm                                | 4.0e-5                                                  | 1.6e-5    | 0.014  | 0.170            | 0.170              | 0.398      |
| Systolic BP, mmHg                         | 1.8e-6                                                  | 4.0e-6    | 0.653  | 1                | 0.956              | 1          |
| Diastolic BP, mmHg                        | 1.2e-4                                                  | 3.5e-5    | 0.001  | 0.014            | 0.014              | 0.022      |
| Resp. Rate, bpm                           | -2.5e-5                                                 | 1.1e-4    | 0.817  | 1                | 0.956              | 1          |
| <i>n</i> = 20,718                         |                                                         |           |        |                  |                    |            |

**eFigure 2.** Laboratory result percentile vs. individual effect.

A) Thyroid Stimulating Hormone

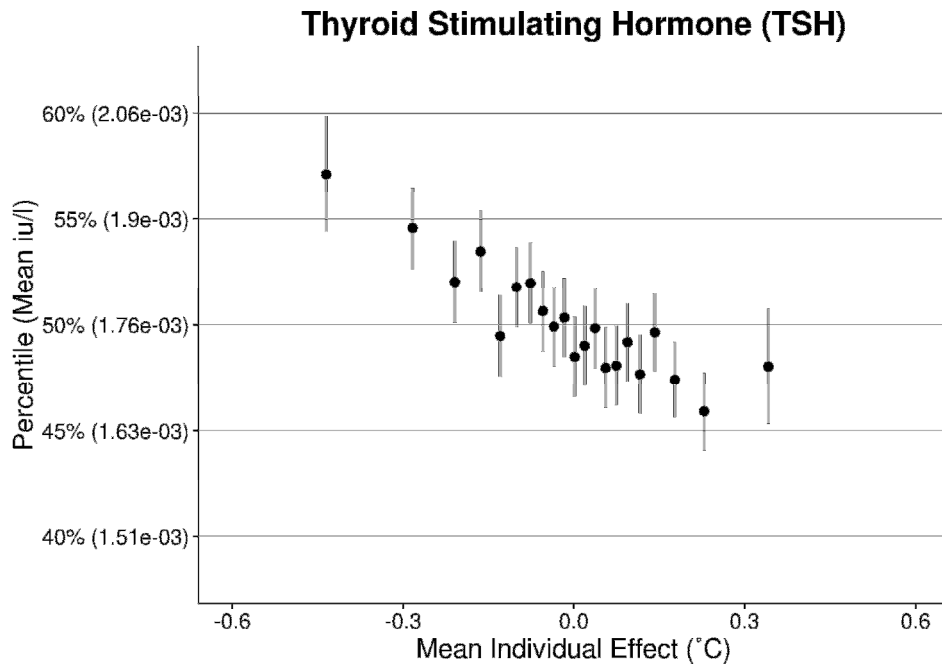

B) C-Reactive Protein

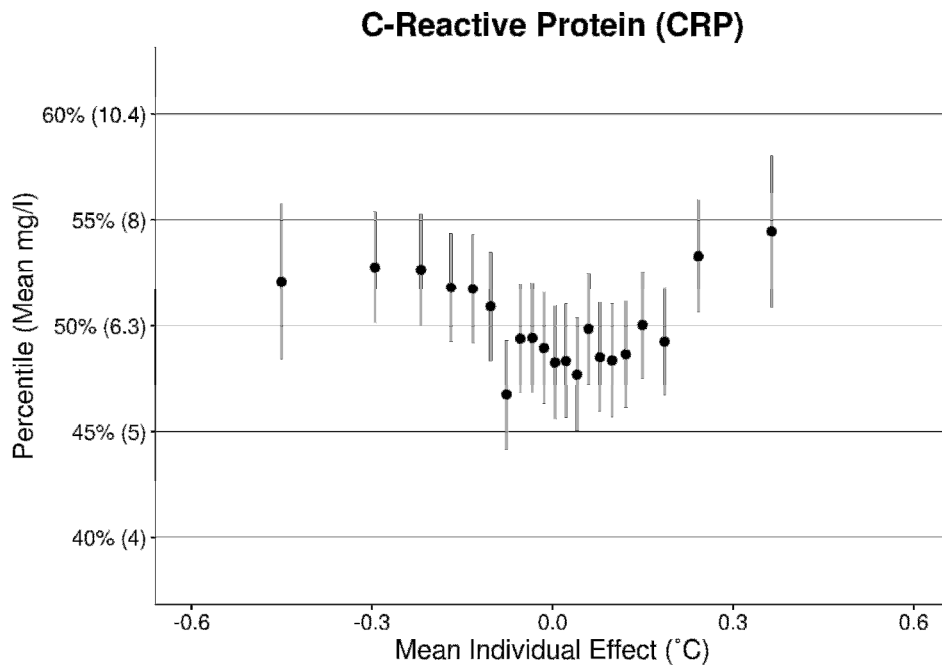

Supplement: obez041793.ww1.pdf [file obez041793.ww1.pdf]
